# Supplementary material for: Formation of glycerol carbonate from glycerol and urea catalysed by metal monoglycerolates
Source: Royal Society of Chemistry journal article supplement (doi:10.1039/c3gc37028c), 2013-01-01

***Supporting On-Line Information***

**Formation of glycerol carbonate from glycerol and urea catalysed by metal  
monoglycerolates**

Terence W. Turney<sup>1,2\*</sup>, Antonio Patti<sup>1</sup>, Will Gates<sup>3</sup>, Uzma Shaheen<sup>1</sup> and Sanjitha  
Kulasegaram<sup>1</sup>

1. School of Chemistry, School of Chemistry, Monash University, Clayton, Victoria 3800,  
Australia 2. Department of Materials Engineering, 3. Department of Civil Engineering,  
Monash University, Clayton, Victoria 3800, Australia.

\* Address correspondence to: [terry.turney@monash.edu](mailto:terry.turney@monash.edu).

Table S1: Effect of catalyst loading on glycerol + urea conversion and yield of glycerol carbonate

| Catalyst<br>(%) | Conversion<br>(%) | Selectivity<br>(%) |     |     |     | Yield<br>(%) |
|-----------------|-------------------|--------------------|-----|-----|-----|--------------|
|                 |                   | Glyc.<br>carb.     | SP1 | SP3 | SP4 |              |
| 0               | 26                | 82                 | 16  | 0   | 0   | 22           |
| 0.1             | 53                | 63                 | 37  | 0   | 0   | 34           |
| 0.5             | 61                | 76                 | 24  | 0   | 0   | 46           |
| 1.0             | 79                | 87                 | 5   | 2   | 6   | 69           |
| 5.0             | 58                | 90                 | 4   | 1   | 2   | 52           |

Reaction conditions: a 1:1 molar ratio of glycerol to urea with various loadings of ZMG (% wt ZMG w.r.t glycerol) at 140°C/40 mbar over 6 h, monitored and quantified by gas chromatography.

Table S2: ZnO as a catalyst for the formation glycerol carbonate

| Time<br>(h) | Conversion<br>(%) | % Selectivity  |     |     |     |     | Yield*<br>(%) |
|-------------|-------------------|----------------|-----|-----|-----|-----|---------------|
|             |                   | Glyc.<br>Carb. | SP1 | SP2 | SP3 | SP4 |               |
| 0.5         | 17                | 62             | 38  | 0   | 0   | 0   | 10            |
| 1.5         | 35                | 77             | 23  | 0   | 0   | 0   | 27            |
| 2           | 45                | 79             | 21  | 0   | 0   | 0   | 36            |
| 3           | 69                | 86             | 10  | 0   | 2   | 2   | 59            |
| 4           | 66                | 89             | 7   | 0   | 2   | 2   | 59            |
| 5           | 72                | 93             | 4   | 0   | 1   | 2   | 67            |
| 6           | 75                | 91             | 2   | 2   | 1   | 4   | 68            |
| 7           | 76                | 94             | 1   | 2   | 1   | 2   | 71            |

Reaction conditions: catalyst (ZnO) amount 5% wt with respect to glycerol, time 7h, molar ratio of glycerol:urea = 1:1, pressure 40 mbar, T = 140<sup>0</sup>C. \* Yields determined by gas chromatography.

Table S3: Effectiveness of cobalt monoglycerolate as a catalyst in the formation of glycerol carbonate

| Time<br>(h) | Conversion<br>(%) | Selectivity    |     |     |     | Yield Glycerol Carbonate<br>(%) |
|-------------|-------------------|----------------|-----|-----|-----|---------------------------------|
|             |                   | Glyc.<br>carb. | SP1 | SP3 | SP4 |                                 |
| 2           | 56                | 69             | 27  | 4   | 0   | 39                              |
| 3           | 53                | 71             | 22  | 4   | 3   | 38                              |
| 4           | 58                | 72             | 19  | 4   | 6   | 41                              |
| 5           | 66                | 75             | 14  | 5   | 6   | 50                              |
| 6           | 63                | 82             | 11  | 3   | 4   | 52                              |

Reaction conditions: Molar ratio of glycerol : urea = 1:1 with 5% wt. CMG at 140°C/40 mbar.

Table S4: Re-using ZMG over two reaction cycles in a glycerol/urea mixture<sup>1</sup>

| Time<br>h                    | % Conv                   |                 | Yield of GC     |                 | Yield of SP1    |                 |
|------------------------------|--------------------------|-----------------|-----------------|-----------------|-----------------|-----------------|
|                              | 1 <sup>ST</sup><br>Cycle | 2 <sup>nd</sup> | 1 <sup>ST</sup> | 2 <sup>nd</sup> | 1 <sup>ST</sup> | 2 <sup>nd</sup> |
| 3                            | 42                       | 40              | 39              | 37              | 3               | 4               |
| 4                            | 48                       | 45              | 43              | 39              | 2               | 2               |
| 5                            | 51                       | 49              | 46              | 45              | 2               | 1               |
| 6                            | 59                       | 55              | 55              | 53              | 5               | 4               |
| ZMG<br>Recovery <sup>2</sup> | 90%                      | 84%             |                 |                 |                 |                 |

1. Reaction Conditions: glycerol : urea = 1 : 1 molar with 5% wt. ZMG at 6h/140°C/ 40 mbar pressure. 2. Isolated product after MeOH wash of reaction mixture.

Figure S1: Effect of time on glycerol conversion and glycerol carbonate yields in the catalysed and uncatalysed reaction of glycerol with urea

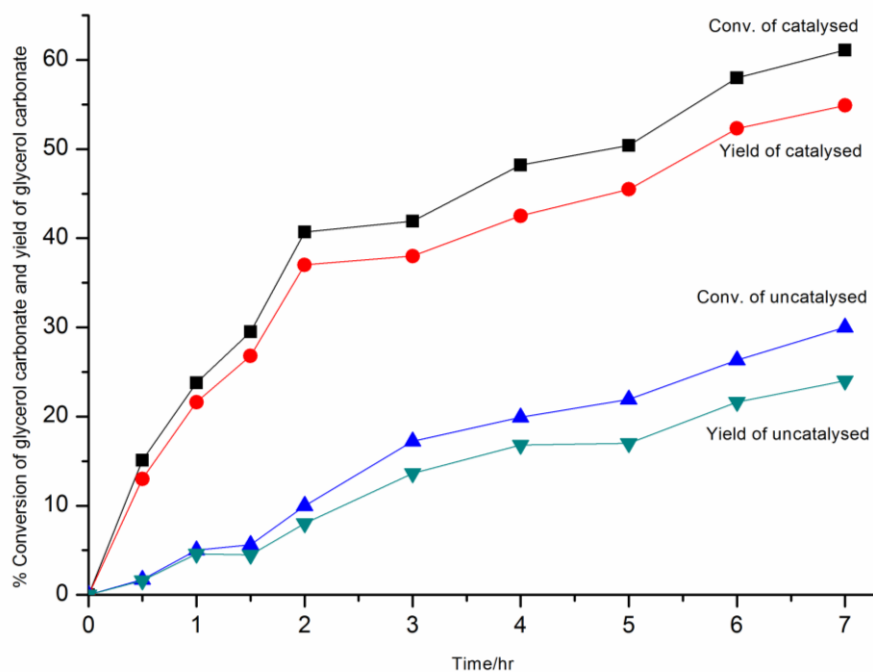

Reaction conditions: 1:1 molar ratio of glycerol to urea with 5% wt. ZMG in the catalysed reaction, performed at 140<sup>0</sup>C/40 mbar.

Figure S2. FTIR of reaction profile with ZnO

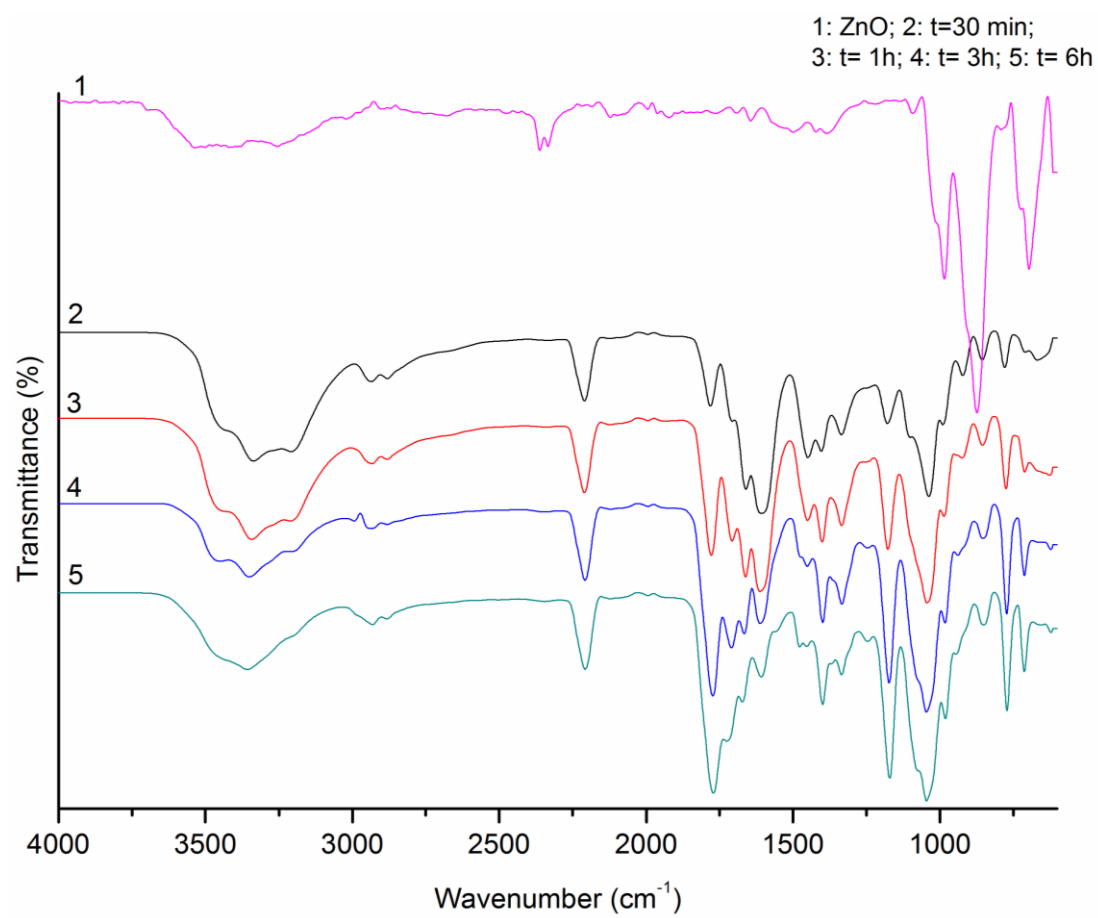

Figure S3. Recovered solid from ZnO reaction after MeOH work-up

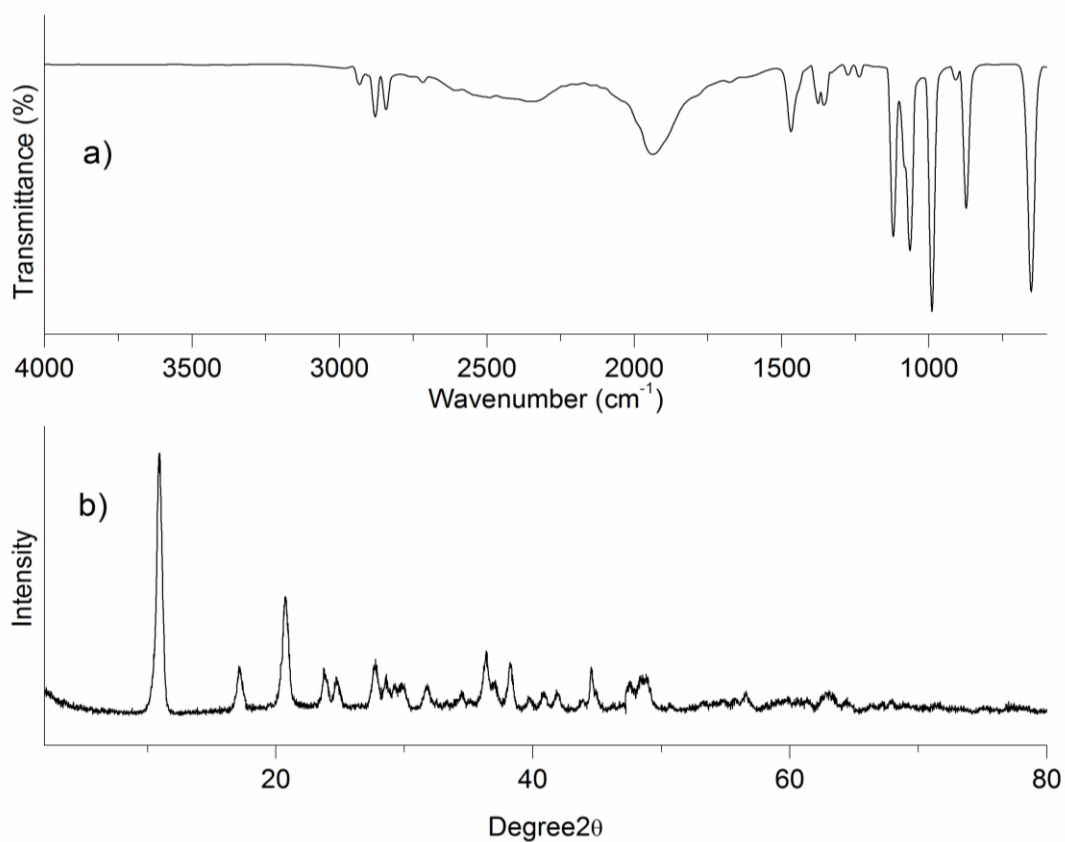

a) FTIR spectrum of solid residue and b) powder XRD diffraction pattern of solid, showing the predominant crystalline phase to be ZMG.



Figure S4. Powder XRD of synthesised  $\text{Zn}(\text{NCO})_2(\text{NH}_3)_2$

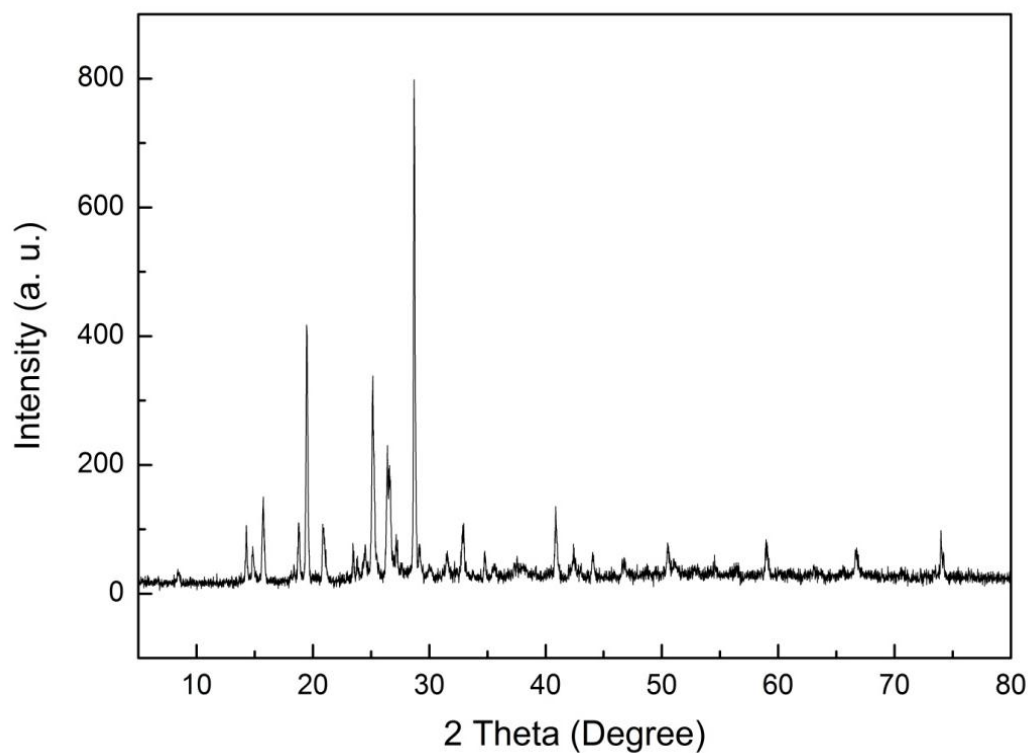

Figure S5. FTIR spectrum of synthesised  $\text{Zn}(\text{NCO})_2(\text{NH}_3)_2$

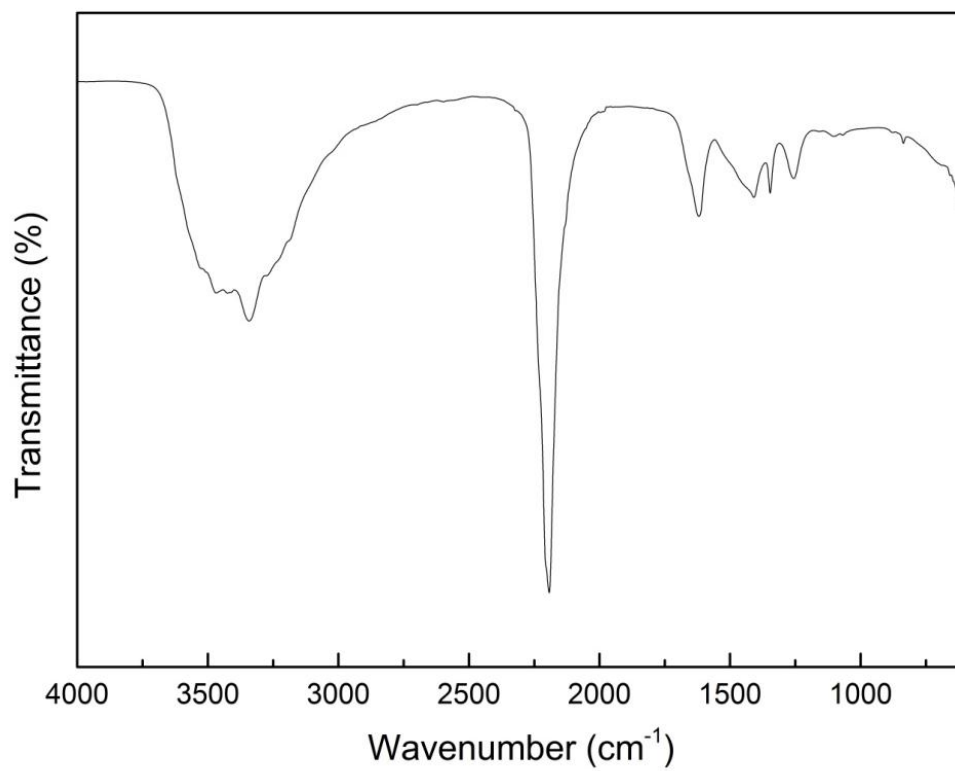

Figure S6. XRD of reaction mixture containing  $\text{Zn}(\text{NCO})_2(\text{NH}_3)_2$  and glycerol (1:1.5 molar eq.)

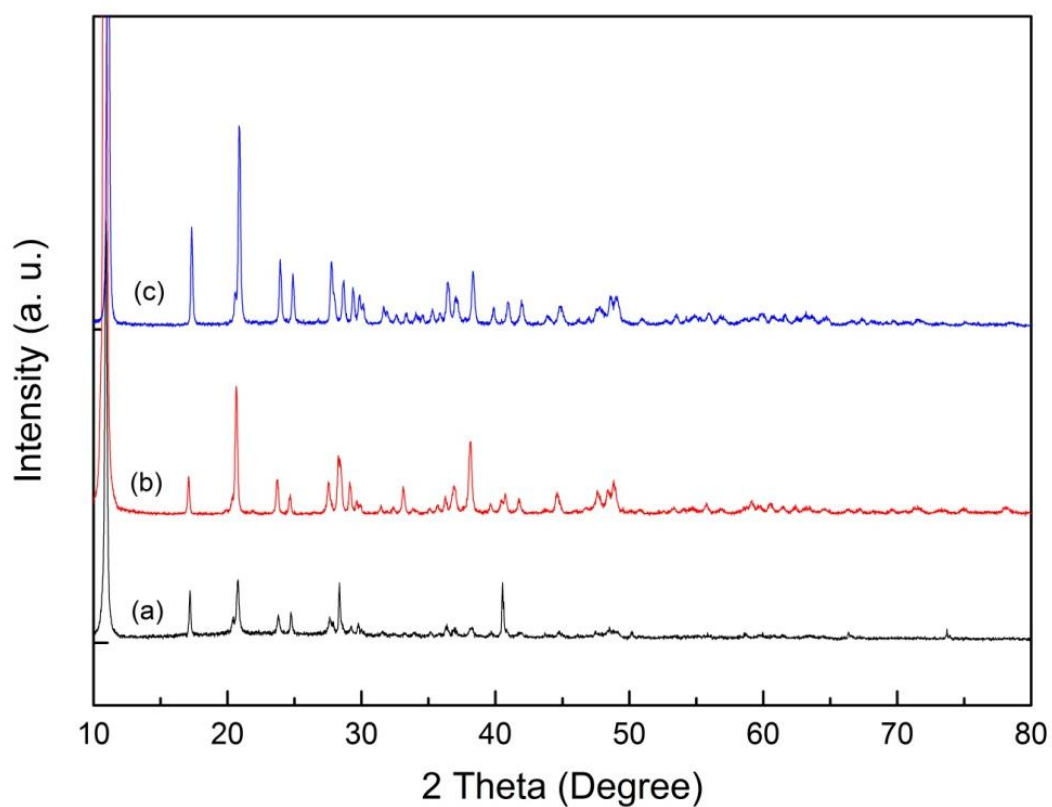

a) XRD of reaction suspension at 30 min., prior to MeOH work-up. b) XRD of solid at 6 h, after methanol work-up. c) XRD of commercial ZMG.

Figure S7. FTIR of reaction mixture of CMG + urea (1:2 molar ratio) after 1 h heating at 140°C/40 mbar

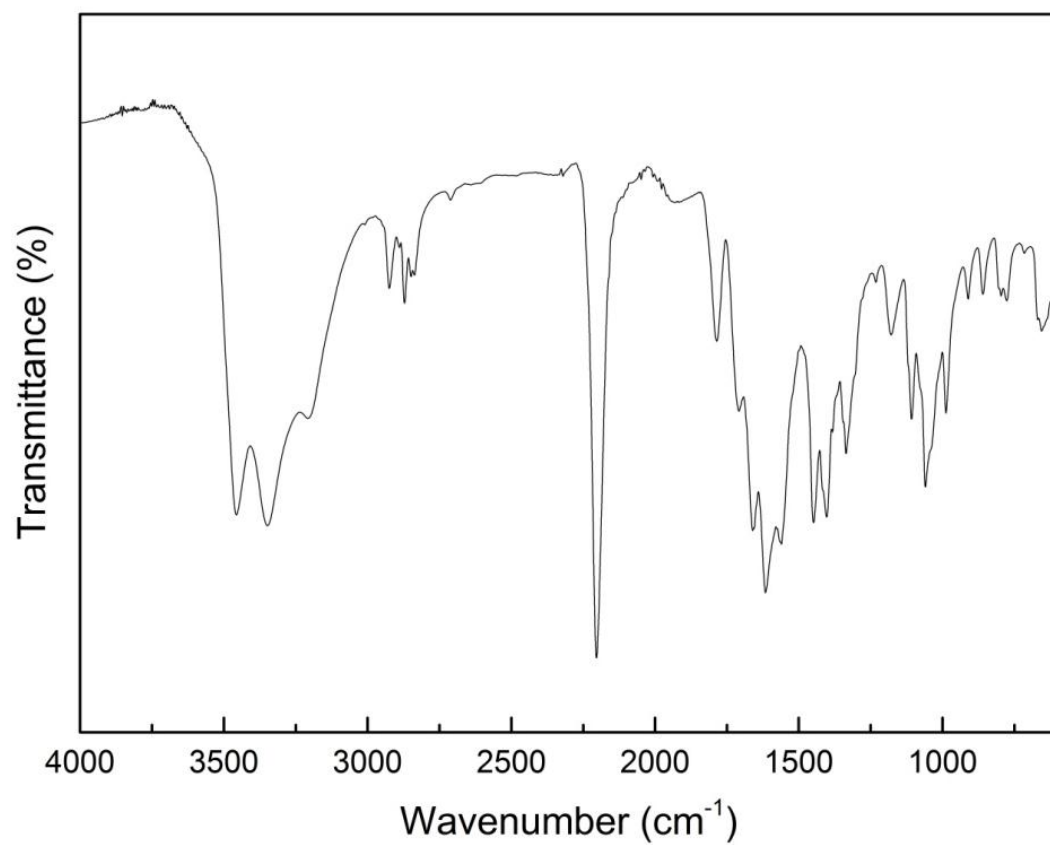

Supplement: c3gc37028c.pdf [file c3gc37028c.pdf]
